# Supplementary material for: Prevalence of Non-alcoholic Fatty Liver Disease and Its Associated Factors in Admixed Individuals With Type 1 Diabetes: a Cross-sectional Study in a Tertiary Care Center in Brazil
Source: Research Square preprint supplement (doi:10.21203/rs.3.rs-138525/v1), 2021-01-05
Supplement: Supplementary file 1 [file 4759e627ee7eab13c866b98a.docx]

**Prevalence of non-alcoholic fatty liver disease and its associated factors in admixed individuals with type 1 diabetes: a cross-sectional study in a tertiary care center in Brazil**

Bianca Senger Vasconcelos Barros a*, Fernanda Cruz Monteiro b, Carlos Terra c,d, Marilia Brito Gomesa

aDepartment of Internal Medicine, Diabetes Unit, Pedro Ernesto Hospital, State University of Rio de Janeiro (UERJ), 20.551-030, Rio de Janeiro - RJ, Brazil.

b Department of Radiology, Pedro Ernesto Hospital, State University of Rio de Janeiro (UERJ), 20.551-030, Rio de Janeiro - RJ, Brazil.

c Department of Gastroenterology, Pedro Ernesto Hospital, State University of Rio de Janeiro (UERJ), 20.551-030, Rio de Janeiro - RJ, Brazil.

d Department of Gastroenterology, Federal Hospital of Lagoa, 22470-050, Rio de Janeiro- RJ, Brazil

* Correspondence: Bianca S. V. Barros

Present adress: Department of Internal Medicine, Diabetes Unit, State University of Rio de Janeiro (UERJ)

Boulevard 28 de Setembro, 77 - 3º andar - Vila Isabel

Rio de Janeiro - RJ, Brazil

CEP 20551-030

E-mail: [bibsrj@gmail.com](mailto:bibsrj@gmail.com); Phone/Fax number: +55-21-2868-8224

Supplementary Table. Descriptive data on participants with altered hepatic image

| ID | Gender | Age,  years | Diabetes duration,  Years | HbA1c % (mmol/mol) | Transaminases | Steatosis on ultrasound | Transient elastography | Metabolic syndrome components | FLI Risk |
| --- | --- | --- | --- | --- | --- | --- | --- | --- | --- |
| **Both images altered (US and TE)** | | | | | | | | | |
| 1 | Male | 32 | 16 | 9.6  (81) | Normal | **Mild** | F0-F1  **>S1** | Yes; triglycerides, HDL | **High** |
| 5 | Female | 41 | 22 | 11.3  (100) | Normal | **Mild** | F0-F1  **>S1** | Yes; HDL | Low |
| 42 | Female | 35 | 13 | 7.3  (56) | Normal | **Mild** | **F3**  S0 | Yes; hypertension, HDL | Undetermined |
| 46 | Female | 37 | 20 | 9.2  (77) | Normal | **Mild** | F0-F1  **> S3** | Yes; hypertension, triglycerides | **High** |
| 48 | Male | 51 | 25 | 8.0  (64) | Normal | **Mild** | F0-F1  **> S1** | Yes; hypertension, triglycerides, HDL | **High** |
| **Altered US** | | | | | | | | | |
| 6 | Male | 41 | 15 | 6.7  (50) | Normal | **Mild** | F0-F1  S0 | Yes; triglycerides | Undetermined |
| 7 | Female | 45 | 18 | 7.4  (57) | **ALT=32 U/L**  **AST=50 U/L** | **Mild** | F0-F1  S0 | Yes.; hypertension, triglycerides, HDL | Undetermined |
| 27 | Female | 51 | 36 | 6.8  (51) | Normal | **Mild** | F0-F1  S0 | Yes; hypertension, HDL | Low |
| 33 | Female | 19 | 6 | 14.3  (133) | Normal | **Mild** | F0-F1  S0 | Yes; HDL | Low |
| 63 | Female | 51 | 31 | 9.5  (80) | Normal | **Mild** | F0-F1  S0 | No | Low |
| 89 | Female | 17 | 8 | 7.5  (58) | Normal | **Mild** | F0-F1  **S0** | Yes; HDL | Undetermined |
| 96 | Female | 20 | 13 | 14.1  (131) | Normal | **Mild** | F0-F1  S0 | No | Low |
| **Altered TE** | | | | | | | | | |
| 15 | Male | 51 | 23 | 7.8  (62) | Normal | No | **F4**  **>S1** | Yes; hypertension | **High** |
| 8 | Male | 21 | 18 | 10.3  (89) | Normal | No | F0-F1  **>S1** | No | Low |
| 18 | Male | 50 | 20 | 11.7  (104) | Normal | No | F0-F1  **> S1** | Yes; hypertension | **High** |
| 25 | Female | 30 | 16 | 7.2  (55) | Normal | No | F0-F1  **> S1** | Yes; HDL | Low |
| 35 | Male | 46 | 35 | 7.1  (54) | Normal | No | F0-F1  **> S3** | Yes; hypertension | Undetermined |
| 36 | Female | 26 | 17 | 9.6  (81) | Normal | No | F0-F1  **> S1** | No | Low |
| 44 | Male | 61 | 57 | 7.3  (56) | Normal | No | F0-F1  **> S1** | Yes; hypertension, triglycerides, HDL | **High** |
| 50 | Male | 50 | 10 | 8.9  (74) | Normal | No | F0-F1  **> S1** | No | Low |
| 53 | Female | 34 | 18 | 8.9  (74) | Normal | No | F0-F1  **> S1** | No | **High** |
| 58 | Female | 24 | 12 | 9.3  (78) | Normal | No | F0-F1  **> S1** | No | **High** |
| 84 | Female | 56 | 27 | 7.2  (55) | Normal | No | F0-F1  **> S1** | Yes; hypertension | **High** |
| 91 | Female | 28 | 23 | 10.4  (90) | Normal | No | F0-F1  **> S3** | Yes; hypertension, HDL | Low |
| 31 | Male | 33 | 27 | 8.4  (68) | Normal | No | **F4**  S0 | No | Low |
| 34 | Female | 45 | 32 | 9.5  (80) | Normal | No | **F2**  S0 | Yes; hypertension | Undetermined |
| 45 | Male | 48 | 11 | 10.4  (90) | Normal | No | **F2**  S0 | No | Low |
| 70 | Male | 48 | 21 | 8.2  (66) | Normal | No | **F2**  S0 | Yes; hypertension | Low |
| 73 | Female | 35 | 23 | 8.6  (70) | Normal | No | **F3** | Yes; hypertension, triglycerides, HDL | **High** |
| 87 | Female | 43 | 18 | 11.2  (99) | Normal | No | **F3**  S0 | Yes; hypertension, Trig, HDL | **High** |

ID: identification number on database; HbA1c: glycated hemoglobin A1c; FLI risk: fatty liver index risk. High risk corresponds to FLI ≥ 60; low risk <30; undermined risk: FLI values between 30 and 60. S0, ≥ S1, ≥ S2, ≥ S3 correspond to stages of steatosis and F0-F1, F2, F3 and F4 correspond to stages of fibrosis, determined by elastography.
